# Supplementary material for: Analysis of the Circadian Regulation of Cancer Hallmarks by a Cross-Platform Study of Colorectal Cancer Time-Series Data Reveals an Association with Genes Involved in Huntington’s Disease
Source: MDPI journal article supplement (doi:10.3390/cancers12040963), 2020-04-13
Supplement: s1 [file s1]

American Joint Committee on Cancer Tumor Stage Code

American Joint Committee on Cancer Metastasis Stage Code

|          |      |
|----------|------|
| TP53     | 49%  |
| PIK3CA   | 29%  |
| ATM      | 13%  |
| MTOR     | 9%   |
| CREBBP   | 8%   |
| HTT      | 7%   |
| MYC      | 7%   |
| EP300    | 6%   |
| ABCB1    | 6%   |
| PER3     | 6%   |
| PER1     | 5%   |
| NRAS     | 5%   |
| HSPH1    | 5%   |
| MAPK15   | 5%   |
| ARNTL2   | 4%   |
| SIN3A    | 4%   |
| ABCC2    | 4%   |
| CLTC     | 4%   |
| NR1D1    | 4%   |
| PARP1    | 3%   |
| CSNK1D   | 3%   |
| ARNTL    | 3%   |
| CSNK2A1  | 3%   |
| DLG4     | 3%   |
| PRKCA    | 3%   |
| CASP3    | 3%   |
| AKT1     | 3%   |
| TAF4B    | 3%   |
| PARP1    | 3%   |
| PIK3CD   | 3%   |
| NONO     | 2.7% |
| SOD2     | 2.7% |
| POLR2K   | 2.7% |
| CSNK1E   | 2.5% |
| GSK3B    | 2.5% |
| PRKAA1   | 2.5% |
| PER2     | 2.5% |
| NR1D2    | 2.5% |
| CLOCK    | 2.5% |
| CYP2D6   | 2.5% |
| RPS6KB1  | 2.5% |
| AHR      | 2.3% |
| ALAS1    | 2.3% |
| CREB3L4  | 2.3% |
| RORC     | 2.3% |
| BTRC     | 2.3% |
| MAPK8    | 2.3% |
| NPAS2    | 2.1% |
| HIP1     | 2.1% |
| CRY2     | 2.1% |
| SIRT1    | 1.8% |
| FBXL3    | 1.8% |
| BHLHE41  | 1.8% |
| WDR5     | 1.8% |
| NFIL3    | 1.8% |
| SIRT1    | 1.8% |
| GNAQ     | 1.8% |
| MAPK11   | 1.8% |
| NDUFS3   | 1.6% |
| NDUFAB1  | 1.6% |
| TGFB1    | 1.6% |
| VEGFA    | 1.6% |
| NFE2L2   | 1.6% |
| MAPK9    | 1.6% |
| CYP3A5   | 1.6% |
| MAPK12   | 1.6% |
| CRY1     | 1.4% |
| PPARA    | 1.4% |
| RORA     | 1.4% |
| BHLHE40  | 1.4% |
| TEF      | 1.1% |
| TBPL1    | 1.1% |
| SDHD     | 1.1% |
| EGLN1    | 1.1% |
| CES2     | 1.1% |
| XPA      | 1.1% |
| TBP      | 0.9% |
| RRAS     | 0.9% |
| CREB1    | 0.7% |
| RACK1    | 0.7% |
| POLR2D   | 0.7% |
| POLR2C   | 0.7% |
| UQCR10   | 0.7% |
| DGAT2    | 0.7% |
| PPARG    | 0.5% |
| NDUFA4L2 | 0.5% |
| NDUFA4   | 0.5% |
| PPARG    | 0.5% |
| DBP      | 0.5% |
| UQCRHL   | 0.2% |
| CYCS     | 0.2% |
| NDUFA2   | 0%   |
| CYP2D7   | 0%   |

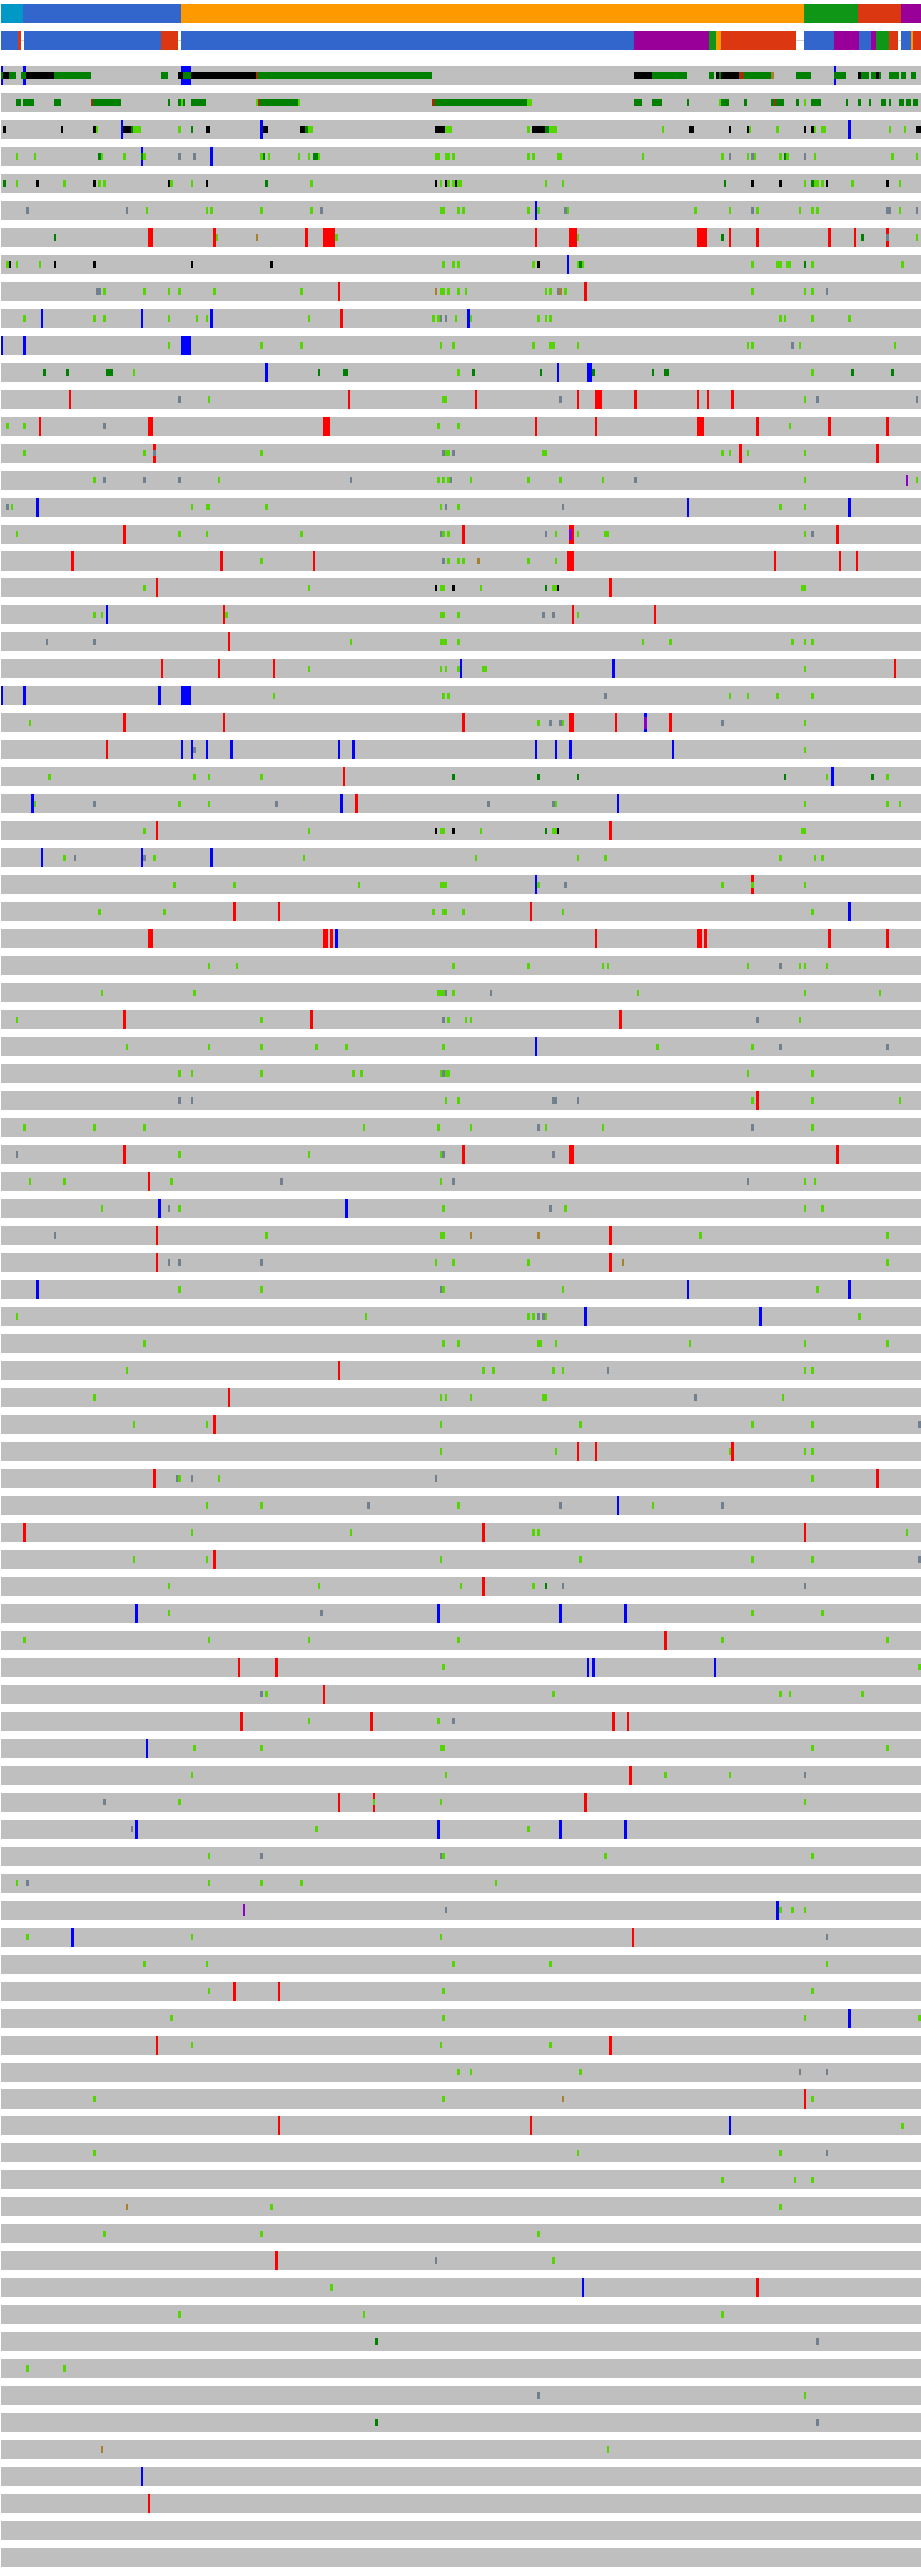

Genetic Alteration

Inframe Mutation (putative driver) Inframe Mutation (unknown significance) Missense Mutation (putative driver) Missense Mutation (unknown significance) Truncating Mutation (putative driver) Truncating Mutation (unknown significance) Fusion Amplification Deep Deletion No alterations

American Joint Committee on Cancer Tumor Stage Code

T1 T2 T3 T4 T4A T4B TIS No data

American Joint Committee on Cancer Metastasis Stage Code

M0 M1 M1A M1B MX No data
