# Supplementary figures and images for: Analysis of the Circadian Regulation of Cancer Hallmarks by a Cross-Platform Study of Colorectal Cancer Time-Series Data Reveals an Association with Genes Involved in Huntington’s Disease
Source: MDPI journal article supplement (doi:10.3390/cancers12040963), 2020-04-13

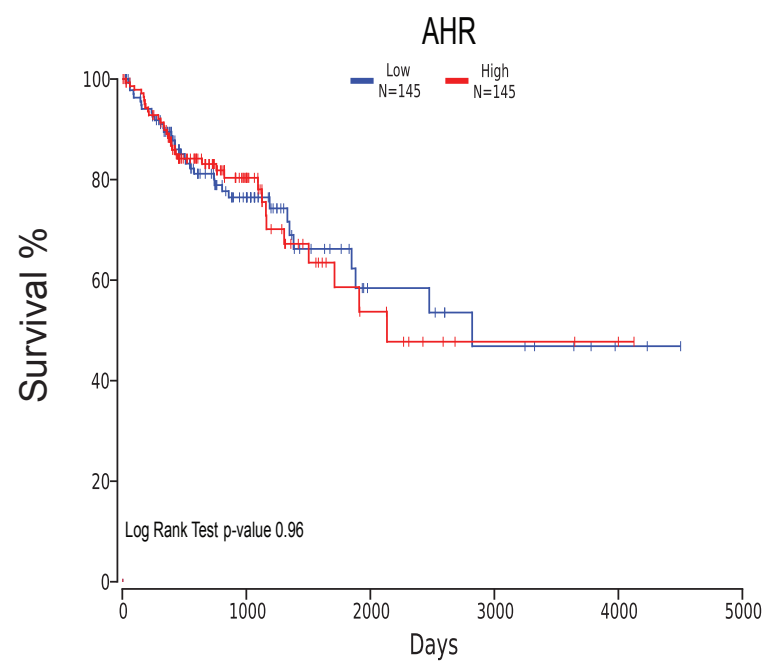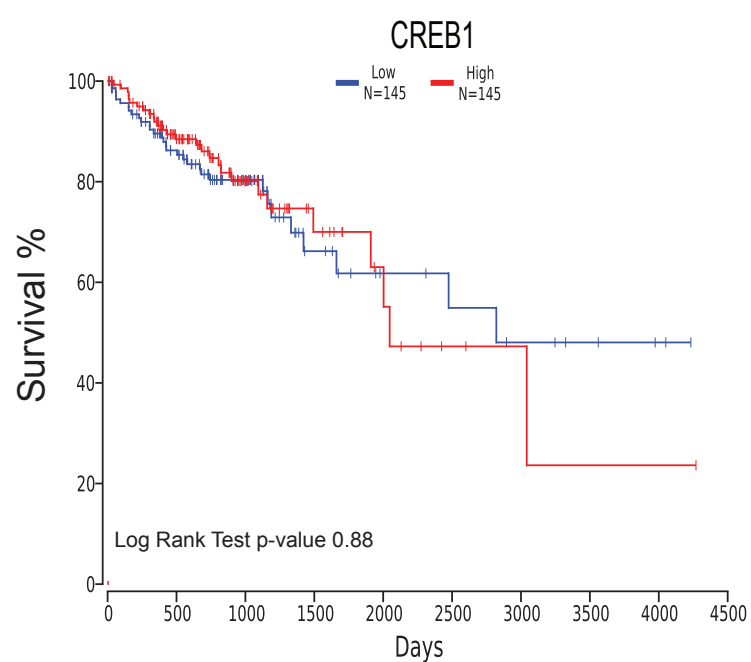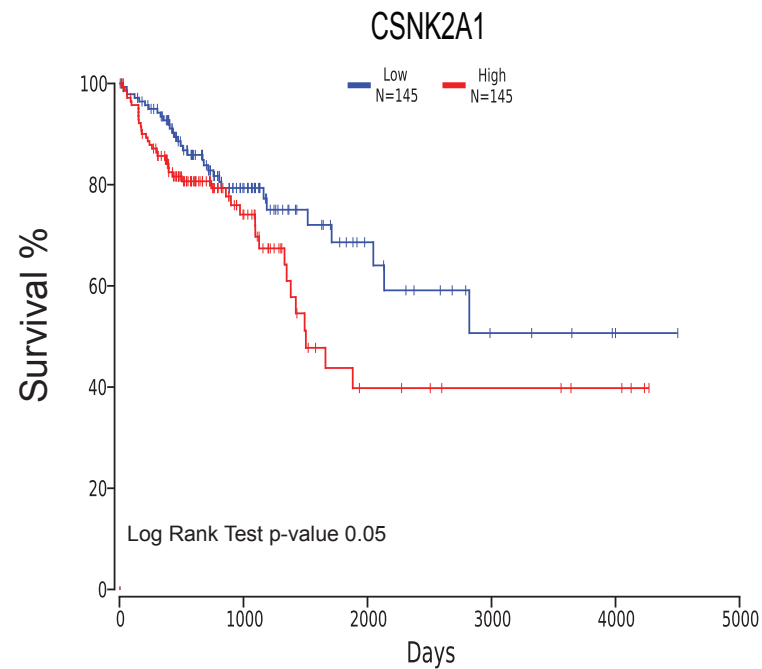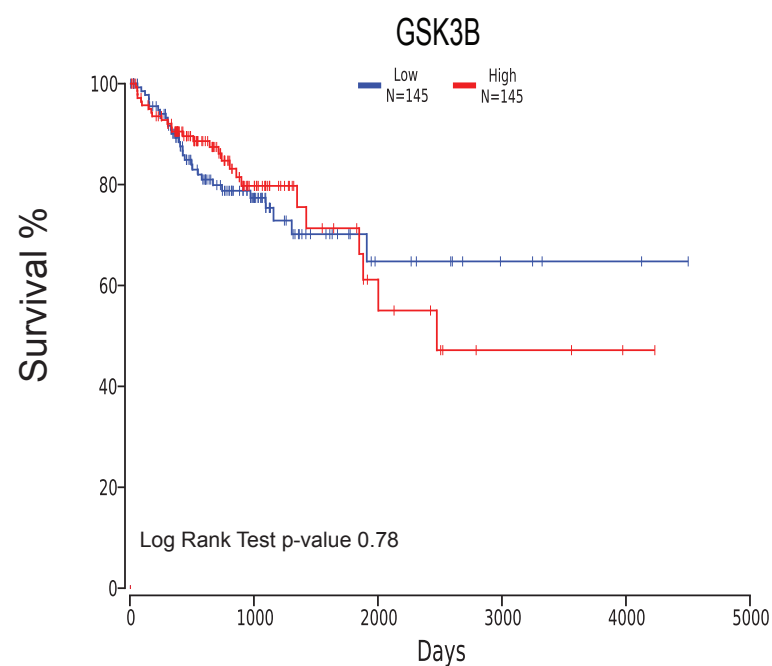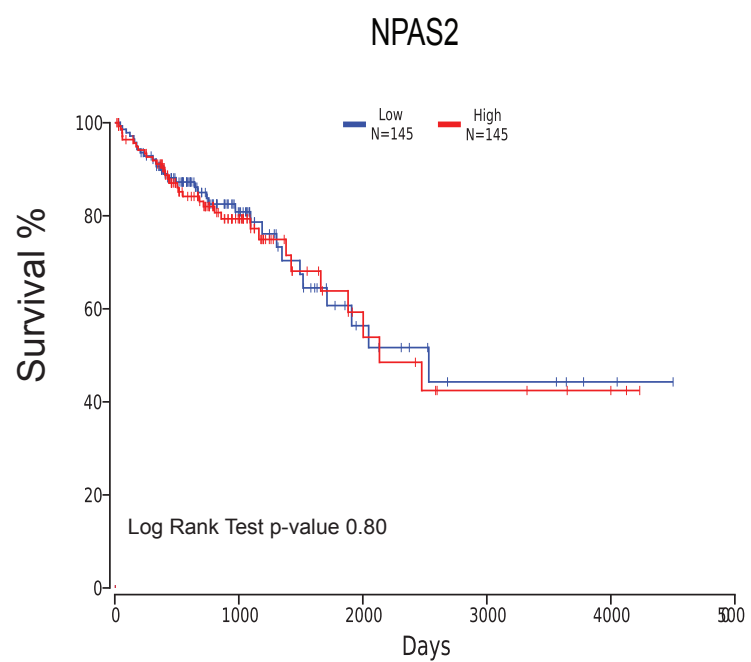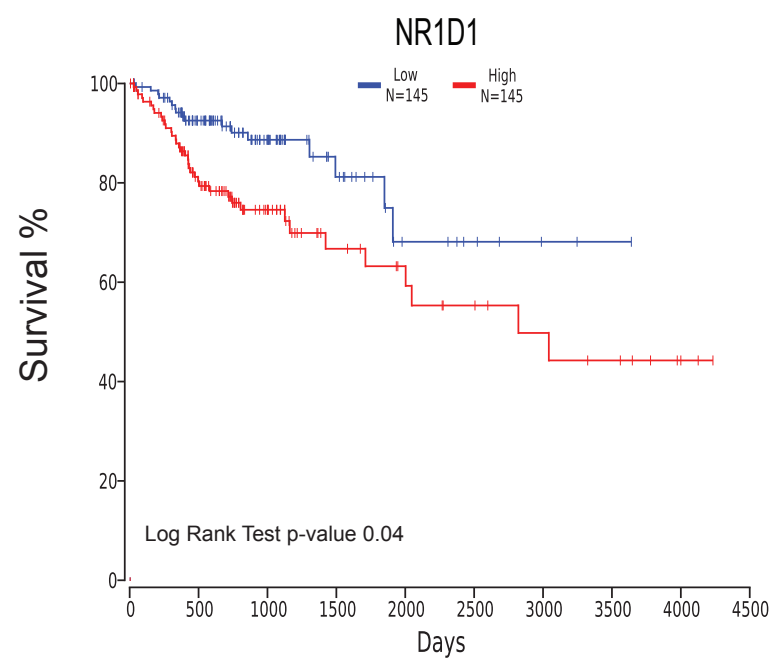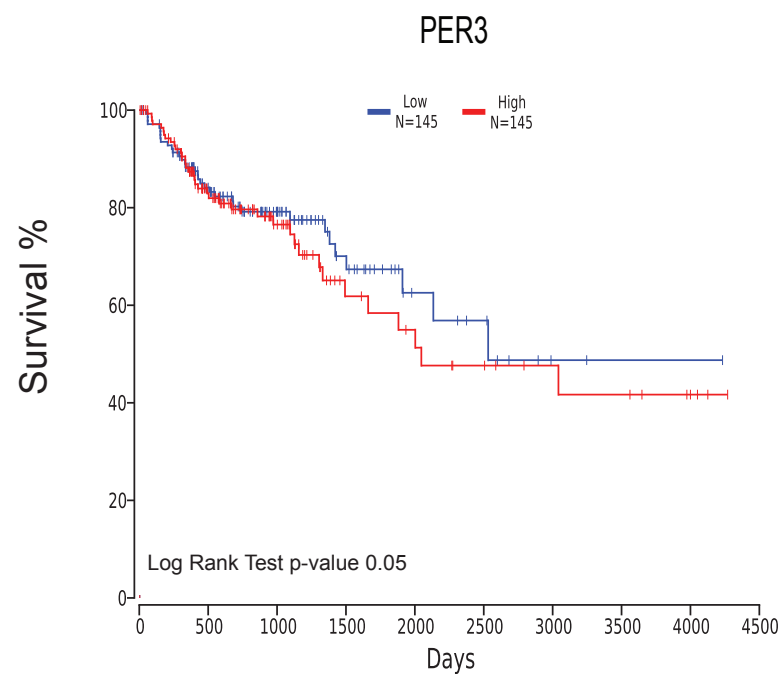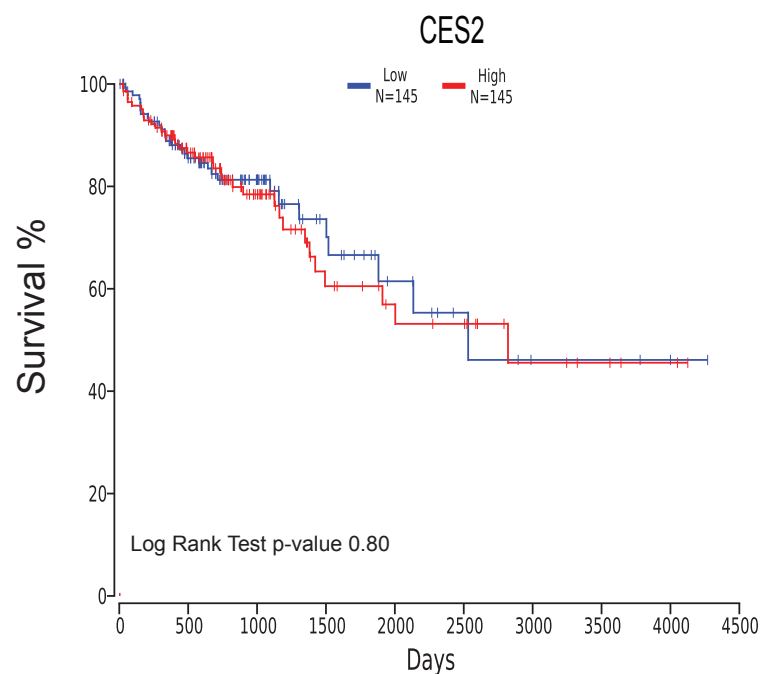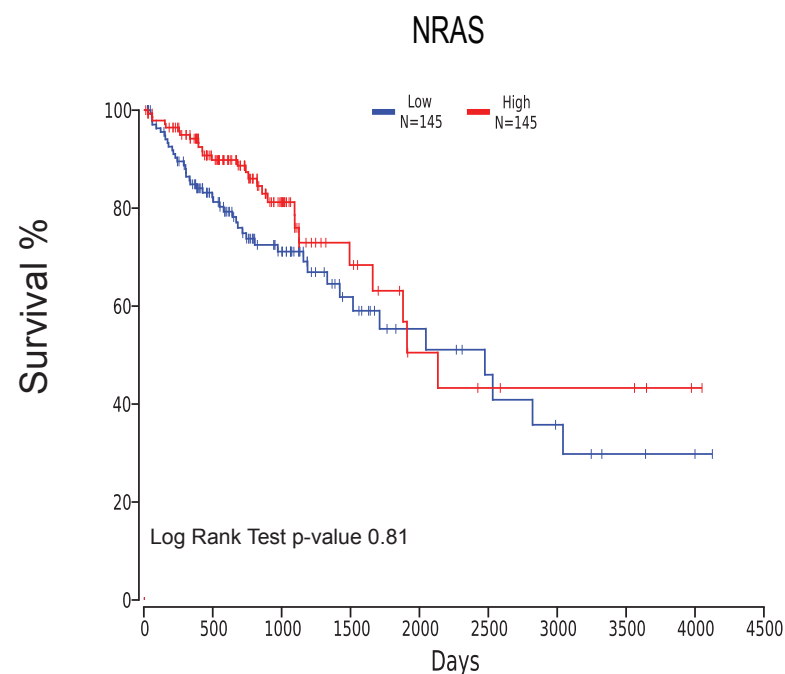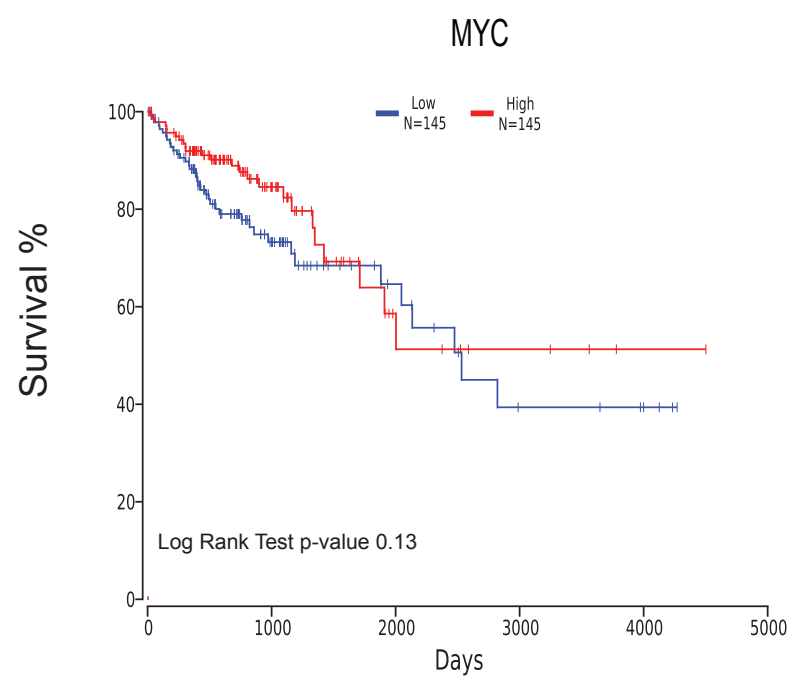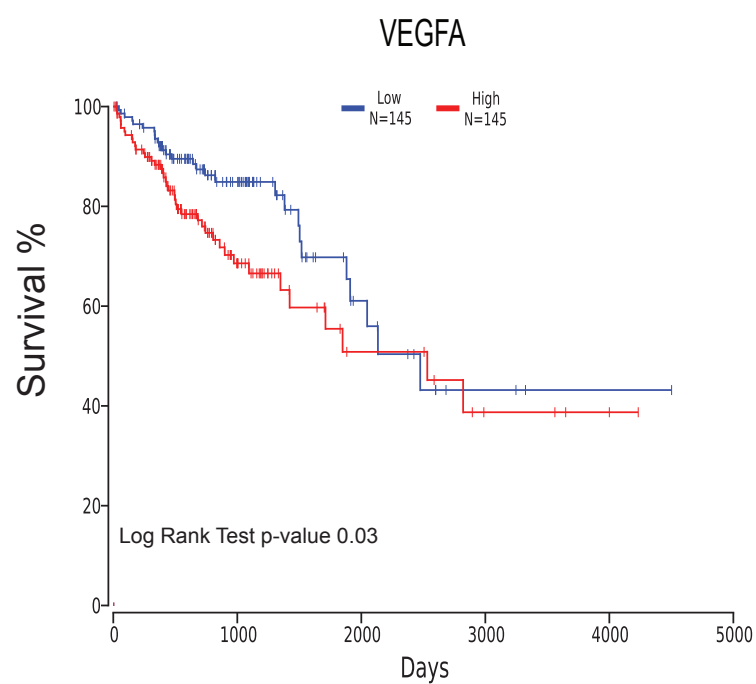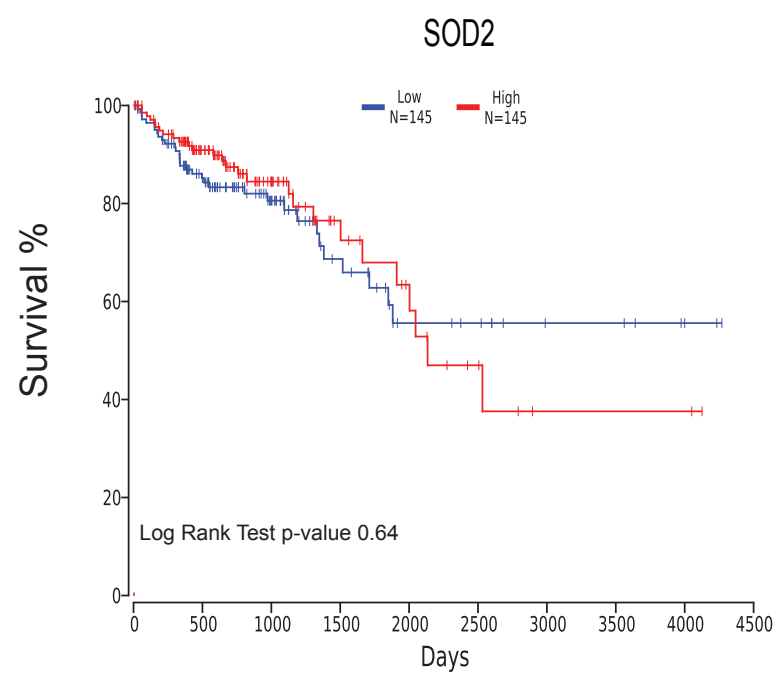

Supplement: s1 [file s1]

A

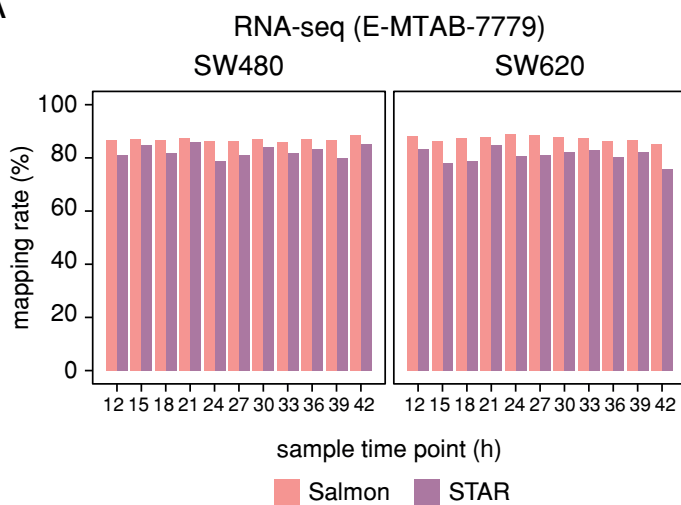

B

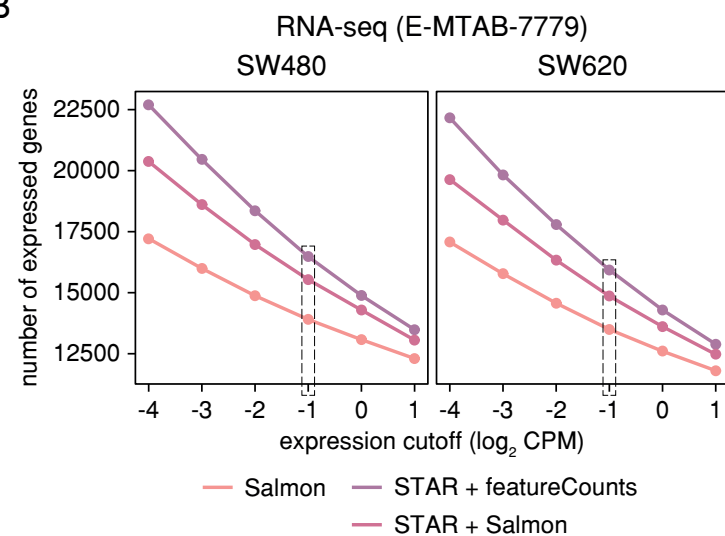

C

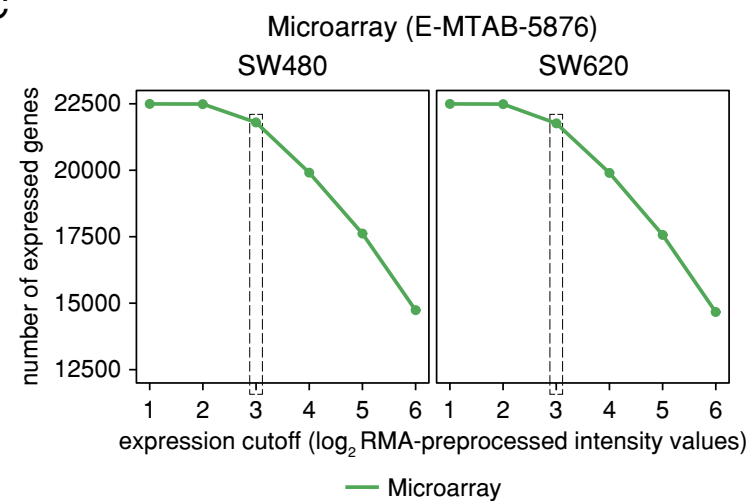

Supplement: s1 [file s1]

A

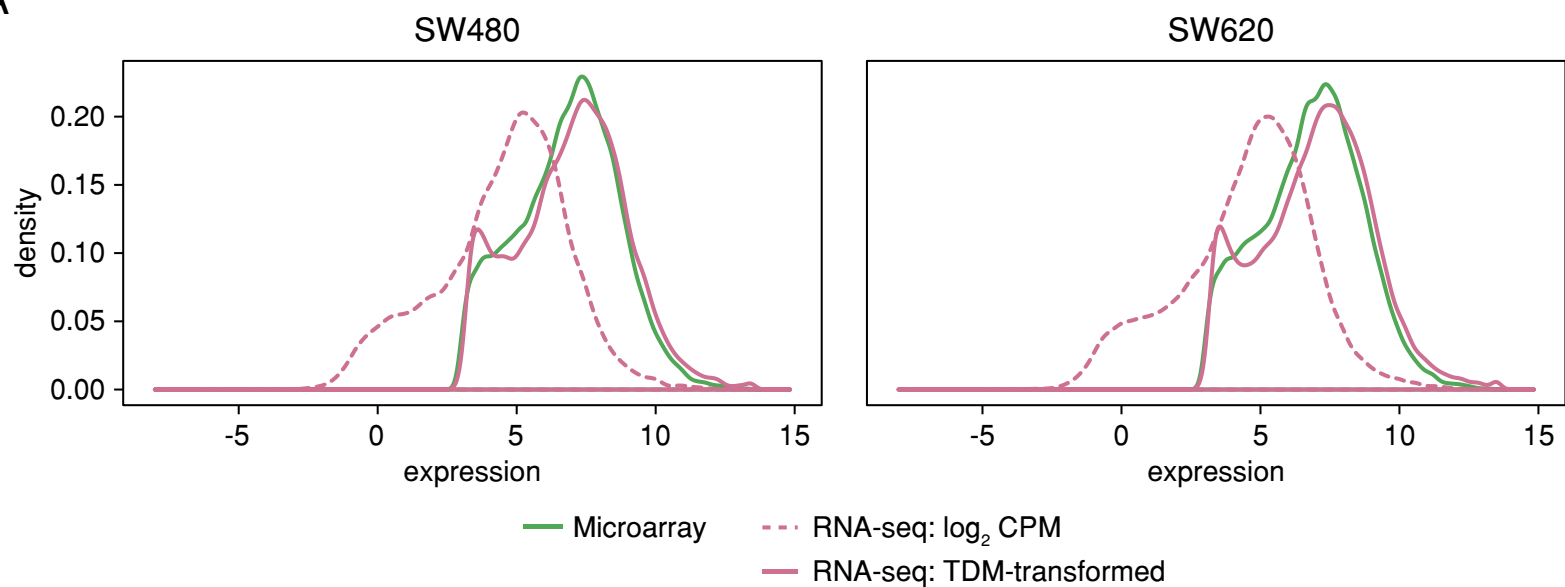

B

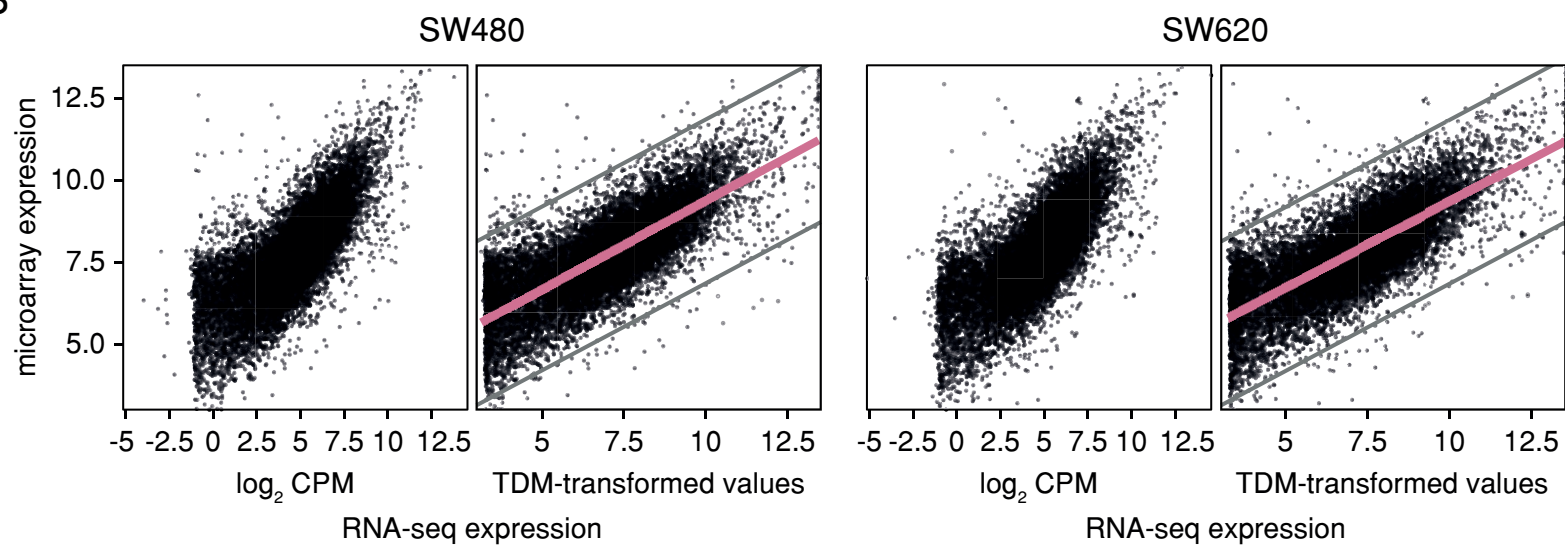

Supplement: s1 [file s1]

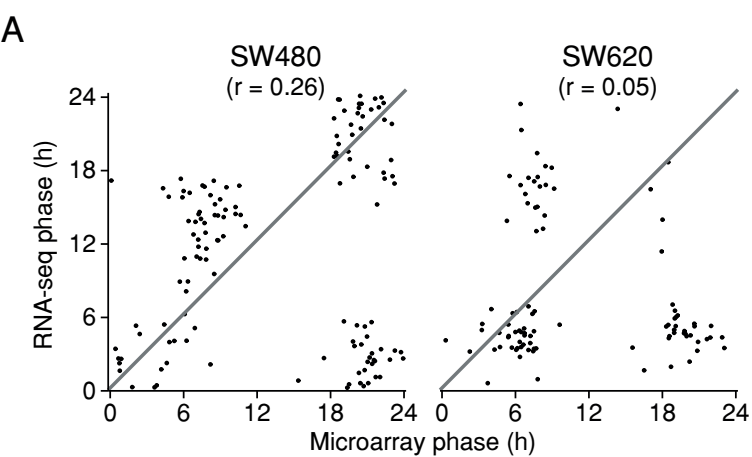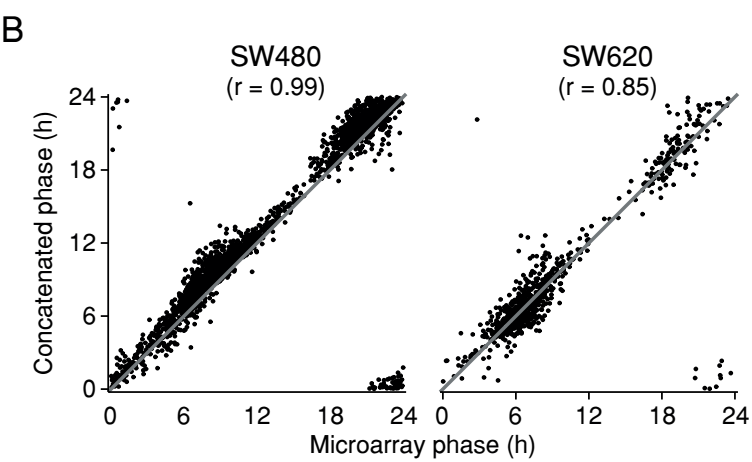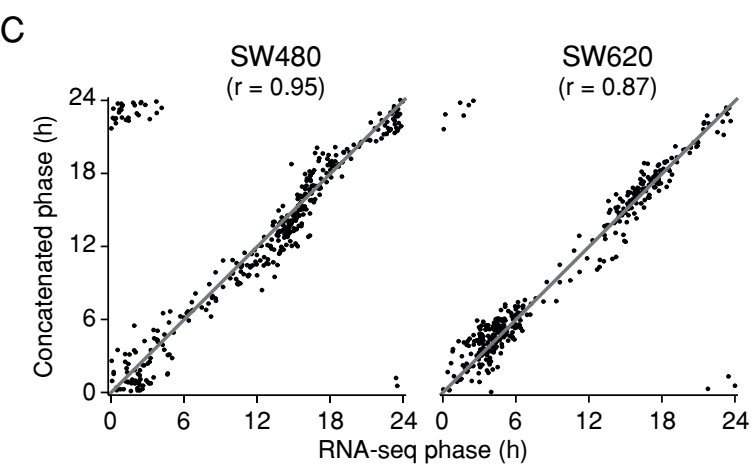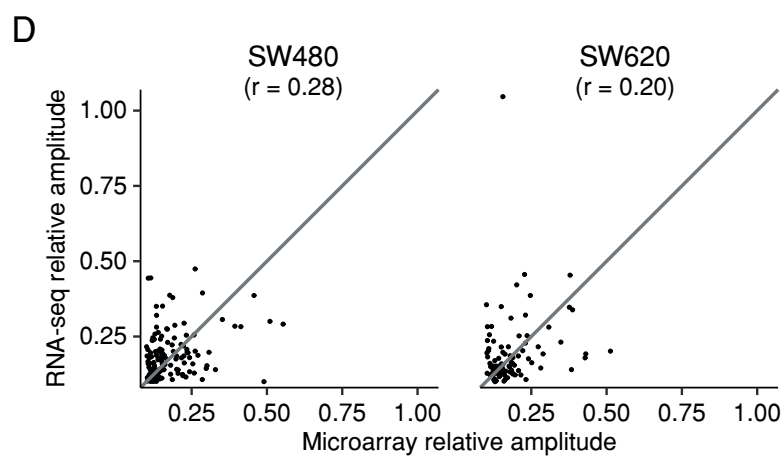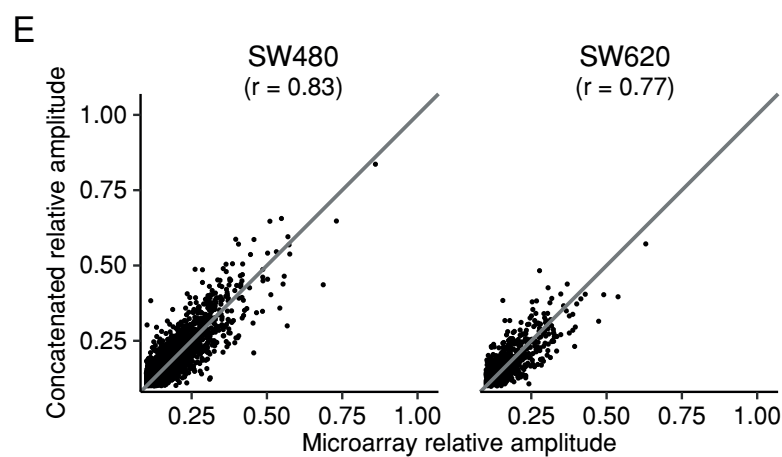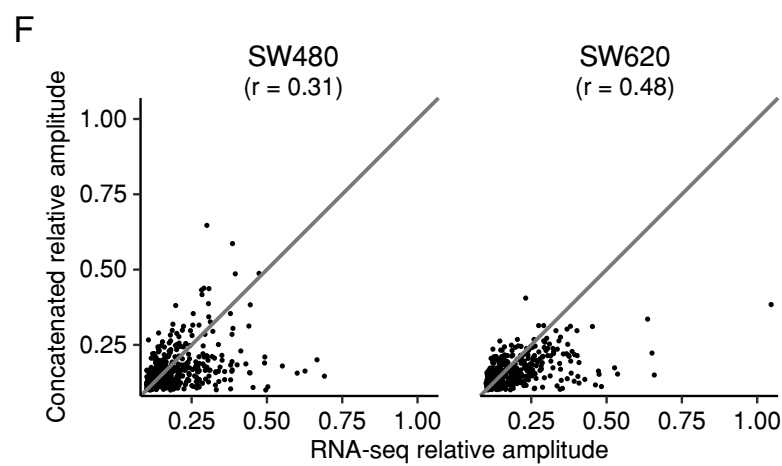

Supplement: s1 [file s1]
